# Supplementary material for: A comparative study of hydrogen evolution reaction on pseudo-monolayer WS2 and PtS2: insights based on the density functional theory
Source: Royal Society of Chemistry journal article supplement (doi:10.1039/c6cy02426b), 2017-01-01
Supplement: c6cy02426b1.pdf [file c6cy02426b1.pdf]

## Supplemental info to “A Comparative Study of Hydrogen Evolution Reaction on WS<sub>2</sub> and PtS<sub>2</sub> pseudo-monolayer: Insight based on Density Functional Theory”

Showkat H. Mir, Sudip Chakraborty, John Wörnå, Som Narayan, Prakash C. Jha, Prafulla K. Jha, Rajeev Ahuja

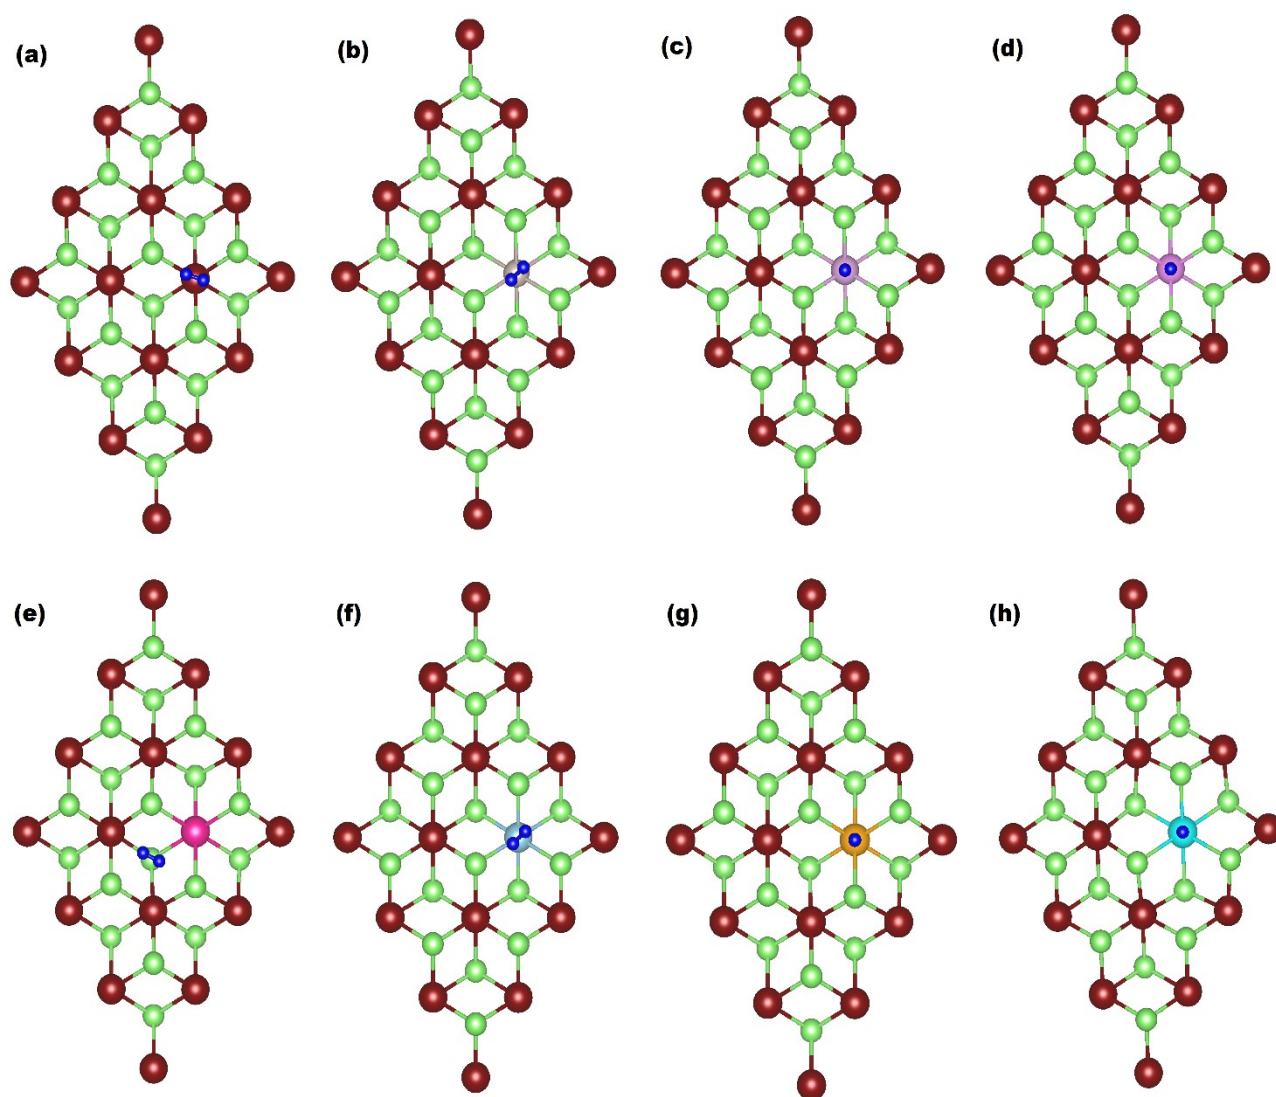

Fig. S1. The optimised geometries of H<sub>2</sub> on pristine (a) and functionalised PtS<sub>2</sub>. (b), (c), (d), (e), (f), (g), and (h) represents systems doped with Ru, Rh, Pd, Ag, Ir, Au and Hg respectively. The optimised geometries shown have been calculated with VDW interactions taken into account. The colour of the elements is designated as follows: maroon for Pt, Red for W, green for S, grey for Ru, plum for Rh, violet for Pd, deep pink for Ag, sky blue for Ir, orange for Au and cyan for Hg.

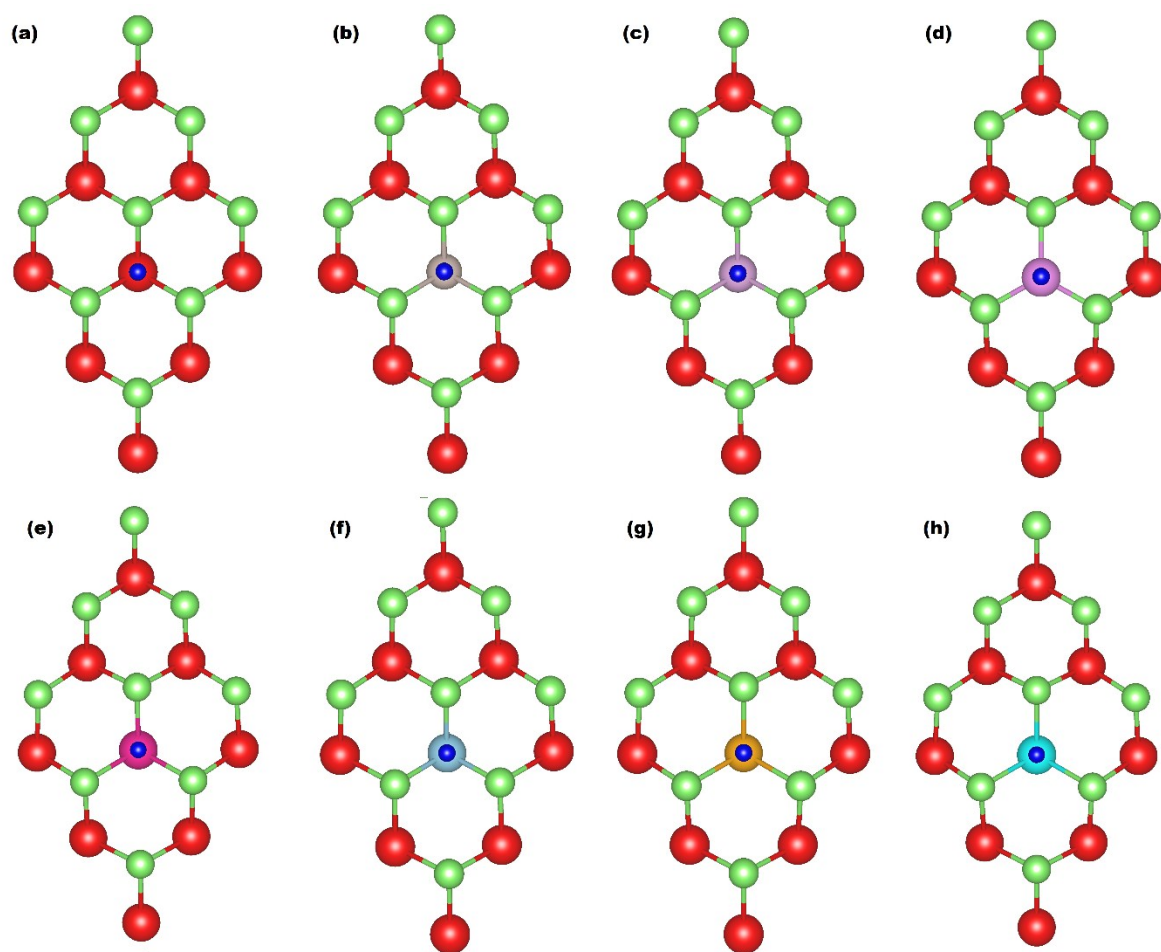

Fig. S2. The optimised geometries of  $\text{H}_2$  on pristine (a) and functionalised  $\text{WS}_2$ . (b), (c), (d), (e), (f), (g), and (h) represents systems doped with Ru, Rh, Pd, Ag, Ir, Au and Hg respectively. The optimised geometries shown have been calculated with VDW interactions taken into account. The colour of the elements is designated as follows: maroon for Pt, Red for W, green for S, grey for Ru, plum for Rh, violet for Pd, deep pink for Ag, sky blue for Ir, orange for Au and cyan for Hg.
